# Supplementary material
Source: bioRxiv or medRxiv preprint supplement (https://www.biorxiv.org/highwire/filestream/36807/field_highwire_adjunct_files/0/122804-1.pdf)
Supplement: Supplementary file [file 122804-1.pdf]

## Supplementary information

Joe Turner, Ritesh Krishna, Arjen E. van 't Hof, Elizabeth R. Sutton, Kelly Matzen, Alistair C. Darby.

The sequence of a male-specific genome region containing the sex determination switch in *Aedes aegypti*.

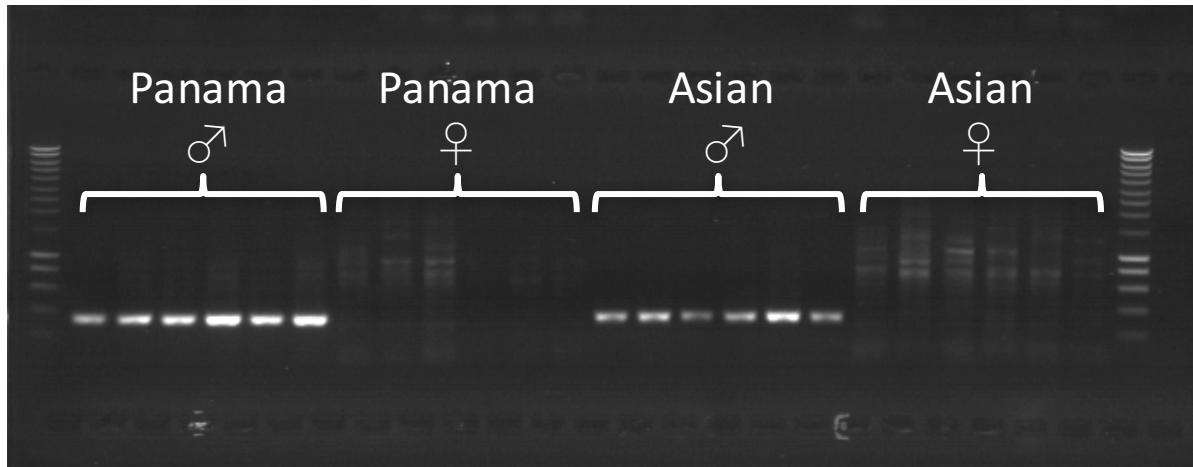

**Figure S1: PCR screening of the M locus gene *Nix* in male and female DNA of wild type *Aedes aegypti* strains.** Primers used were Nix1F (3'-TTGAGTCTGAAAAGTCTATGCAA-5') and Nix1R (3'-TCGCTCTTCCGTGGCATTGA-5'), targeting *Nix* exon 1.

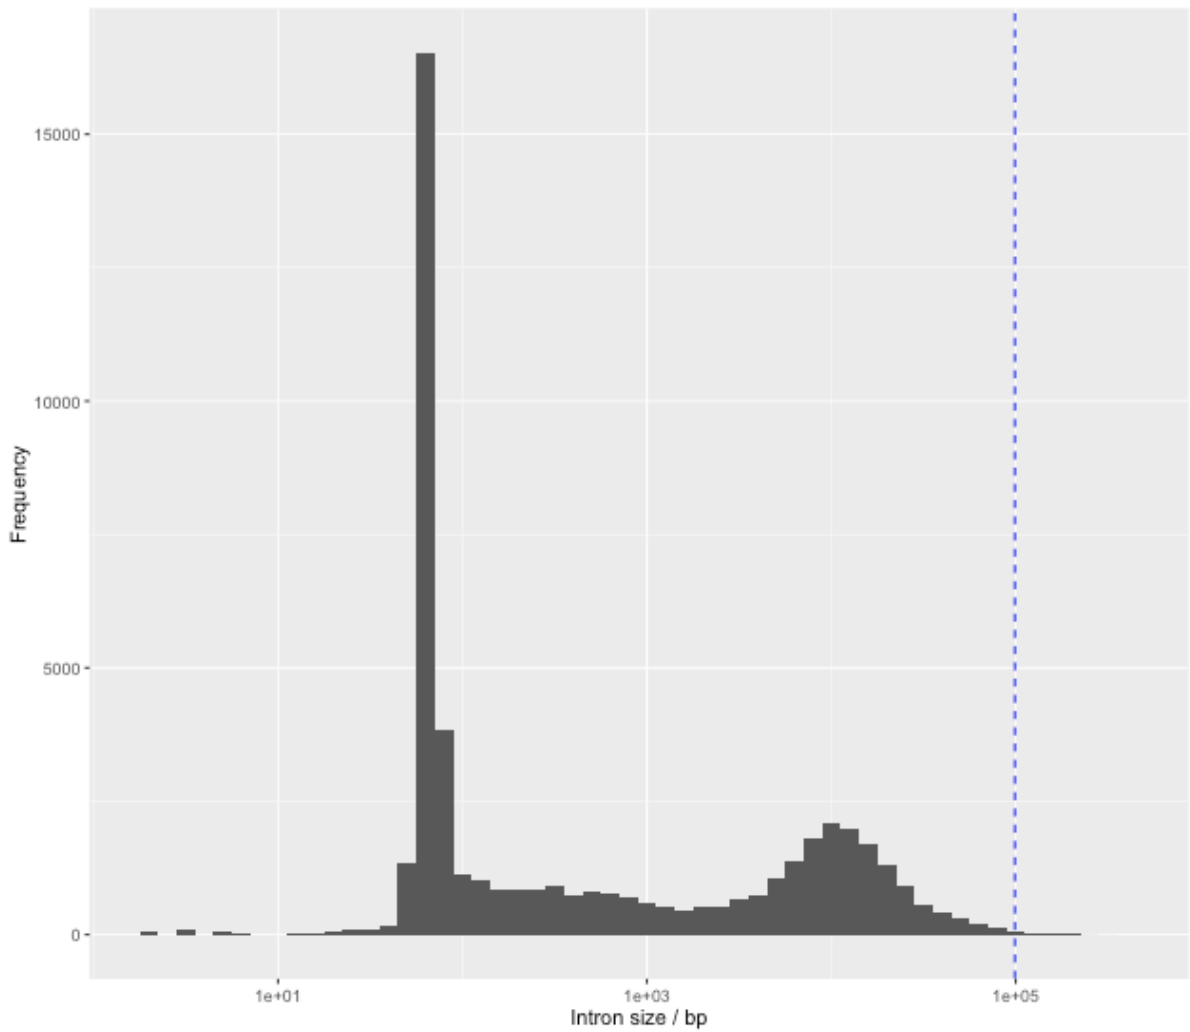

**Figure S2: Intron size distribution in *Aedes aegypti* Liverpool reference genome AaegL3.** Blue dashed line indicates the size of the *Nix* intron relative other introns. X axis is transformed by  $\log_{10}$ .

**Table S1:** Types and abundance of repeats in the 207kb assembled M locus region and 99kb *Nix* intron, identified by RepeatMasker using the *Aedes aegypti* repeat library.

| Repeat Type                        | Entire region      |                        | <i>Nix</i> intron region |                        |
|------------------------------------|--------------------|------------------------|--------------------------|------------------------|
|                                    | Number of elements | Percentage of sequence | Number of elements       | Percentage of sequence |
| <b>Retroelements</b>               | 105                | 42.1%                  | 49                       | 51.0%                  |
| <b>SINEs</b>                       | 8                  | 0.81%                  | 5                        | 1.11%                  |
| Penelope                           | 3                  | 0.08%                  | 2                        | 0.20%                  |
| <b>LINEs</b>                       | 24                 | 5.43%                  | 6                        | 6.85%                  |
| L2/CR1/Rex                         | 4                  | 0.13%                  | 0                        | 0%                     |
| R1/L0A/Jockey                      | 13                 | 3.87%                  | 3                        | 6.60%                  |
| RTE/Bov-B                          | 3                  | 1.33%                  | 0                        | 0%                     |
| L1/CIN4                            | 1                  | 0.02%                  | 1                        | 0.05%                  |
| <b>LTR Elements</b>                | 73                 | 35.8%                  | 38                       | 43.0%                  |
| BEL/Pao                            | 9                  | 0.71%                  | 3                        | 0.87%                  |
| Ty1/Copia                          | 16                 | 11.3%                  | 14                       | 19.2%                  |
| Gypsy/DIRS1                        | 48                 | 23.8%                  | 21                       | 23.0%                  |
| <b>DNA transposons</b>             | 97                 | 11.7%                  | 69                       | 20.1%                  |
| Tc1-IS630-Pogo                     | 11                 | 3.87%                  | 11                       | 9.04%                  |
| Other (Mirage, P-element, Transib) | 1                  | 0.06%                  | 0                        | 0%                     |
| <b>Unclassified</b>                | 6                  | 0.48%                  | 3                        | 0.22%                  |
| <b>Small RNA</b>                   | 8                  | 0.81%                  | 5                        | 1.11%                  |
| <b>Satellites</b>                  | 1                  | 0.75%                  | 0                        | 0%                     |
| <b>Simple repeats</b>              | 19                 | 0.34%                  | 7                        | 0.24%                  |
| <b>Low complexity</b>              | 3                  | 0.07%                  | 1                        | 0.04%                  |
| <b>Total repeats</b>               |                    | 55.4%                  |                          | 71.6%                  |
